# Supplementary material for: Association of Ventilatory Disorders with Respiratory Symptoms, Physical Activity, and Quality of Life in Subjects with Prior Tuberculosis: A National Database Study in Korea
Source: MDPI journal article supplement (doi:10.3390/jpm11070678), 2021-07-19
Supplement: s1 [file s1]

**Supplemental Table S1.** The impact of ventilatory disorder on respiratory symptoms, physical activity limitation and EQ-5D index value in subjects with prior TB

|                              | Model           | Normal<br>(n = 1,466) | Ventilatory disorders                          |                                                |
|------------------------------|-----------------|-----------------------|------------------------------------------------|------------------------------------------------|
|                              |                 |                       | Obstructive ventilatory disorders<br>(n = 783) | Restrictive ventilatory disorders<br>(n = 420) |
| Respiratory symptoms         | Crude model     | Reference             | 2.09 (1.37, 3.21)                              | 1.61 (0.95, 2.72)                              |
|                              | Adjusted model* | Reference             | 1.63 (1.05, 2.82)                              | 1.57 (0.97, 2.26)                              |
| Cough                        | Crude model     | Reference             | 2.30 (1.27, 4.17)                              | 0.95 (0.43, 4.17)                              |
|                              | Adjusted model* | Reference             | 1.68 (0.80, 3.53)                              | 0.68 (0.26, 2.71)                              |
| Sputum                       | Crude model     | Reference             | 2.13 (1.34, 3.39)                              | 1.70 (0.93, 3.12)                              |
|                              | Adjusted model* | Reference             | 1.85 (1.03, 3.37)                              | 2.01 (0.99, 3.03)                              |
| Dyspnea                      | Crude model     | Reference             | 4.05 (1.30, 12.62)                             | 2.49 (0.63, 9.81)                              |
|                              | Adjusted model* | Reference             | 4.19 (1.03, 17.14)                             | 3.03 (0.62, 14.76)                             |
| Physical activity limitation | Crude model     | Reference             | 7.20 (2.93, 17.66)                             | 2.98 (0.76, 9.45)                              |
|                              | Adjusted model* | Reference             | 6.59 (1.98, 21.93)                             | 2.73 (0.73, 10.24)                             |
| EQ-5D index                  | Crude model     | Reference             | - 0.02 (- 0.04, - 0.07)                        | - 0.03 (- 0.05, - 0.06)                        |
|                              | Adjusted model* | Reference             | - 0.001 (- 0.02, 0.02)                         | - 0.03 (- 0.05, 0.001)                         |

Data are presented as a ratio (95% confidence interval) or a difference estimate (95% confidence interval). \* Adjusted for age, sex, body mass index, smoking amount (pack-years), education (categorized as >high school or ≤high school), and family income (categorized as low or high). EQ-5D, EuroQoL five dimensions; TB, tuberculosis.
